# Supplementary material
Source: publisher figshare collection journal article supplement (https://karger.figshare.com/ndownloader/files/32882465)
Supplement: Supplementary file 1 [file 32882465]

**Supplementary Table.** Clinical and Radiologic Features, İntraoperative and Final Diagnosis of all LEAT Patients

|  | **Sex** | **Age**  **(yrs)** | **Final diagnosis** | **Intraoperative diagnosis** | **Location** | **Clinical symptoms** |
| --- | --- | --- | --- | --- | --- | --- |
| Case 1 | M | 19 | PGNT | Glioneuronal tumor | L parietal | Headache, diplopia |
| Case 2 | F | 42 | PGNT | Deferred | R parietal | Weakness |
| Case 3 | F | 11 | PGNT | Consistent with ependymoma | L parietal | Weakness |
| Case 4 | M | 8 | DNT | Consistent with DNT | R parietal | Seizures |
| Case 5 | M | 19 | DNT | Deferred | R temporal | Headache,visual hallucinations |
| Case 6 | M | 9 | DNT | Low grade glial tumor | 3rd ventricle | Seizures |
| Case 7 | M | 33 | DNT | Consistent with DNT | L parietal | Seizures |
| Case 8 | M | 18 | DNT | Low grade glial tumor | L frontal | Seizures |
| Case 9 | F | 27 | DNT | Low grade glial tumor | R temporal | Seizures |
| Case 10 | M | 25 | DNT | Consistent with DNT | L temporal | Seizures |
| Case 11 | F | 26 | DNT | Low grade glial or glioneuronal tumor | R parietal | Seizures |
| Case 12 | M | 2 | DNT | Consistent with DNT | R occipital | Seizures |
| Case 13 | M | 9 | DNT | Low grade glial tumor | R temporoparietal | Seizures |
| Case 14 | M | 13 | DNT | Low grade glial or glioneuronal tumor | L parietooccipital | Diplopia |
| Case 15 | F | 3 | GG | Consistent with pilocytic astrocytoma | Posterior fossa | Gait disorder |
| Case 16 | F | 28 | GG | Low grade glial tumor | R occipital | Headaches, blurred vision |
| Case 17 | M | 12 | GG | Low grade glial tumor | Lateral ventricle | Headaches |
| Case 18 | F | 24 | GG | Consistent with ependymoma | Cerebellum | Headaches |
| Case 19 | M | 7 | GG | Low grade glial or glioneuronal tumor | L cerebellum, vermis and medulla oblongata | Strabismus |
| Case 20 | M | 11 | GG | Low grade glial tumor | Proximity to lateral ventricle | Visual loss |
| Case 21 | M | 34 | GG | Low grade glial tumor | T12-L1 spinal | Right leg weakness |
| Case 22 | F | 29 | GG | Consistent with pilocytic astrocytoma | L temporal | Seizures |
| Case 23 | M | 12 | GG | Consistent with GG | L temporal | Seizures |
| Case 24 | F | 26 | GG | Consistent with GG | L frontal | Seizures |
| Case 25 | M | 10 | GG | Consistent with GG | R temporal | Seizures |
| Case 26 | M | 11 | GG | Consistent with GG | L parietooccipital | Seizures |
| Case 27 | F | 18 | GG | Low grade glial tumor | Cerebellum | Headaches |
| Case 28 | F | 11 | GG | Deferred | L parietal | Dizziness |
| Case 29 | M | 23 | GG | Low grade glial tumor | R temporal | Seizures |
| Case 30 | M | 8 | GG | Consistent with GG | R temporal | Seizures |

*Abbreviations:* LEAT; low grade epilepsy associated neuroepithelial tumour, yrs; years, M; male, F; female, GG; ganglioglioma, DNT; dysembryoplastic neuroepithelial tumor, PGNT; papillary glioneuronal tumor, L; left, R; right.
